# Supplementary material for: MTBE exposure may increase the risk of insulin resistance in male gas station workers
Source: Royal Society of Chemistry journal article supplement (doi:10.1039/d3em00491k), 2023-12-15
Supplement: d3em00491k1.pdf [file d3em00491k1.pdf]

**Supplementary figure 1.** Blood MTBE and TBA levels were increased in gas station workers. MTBE levels (A) and TBA levels (B) were measured in blood from gas station workers (occupational MTBE exposure group, n=83) and other workers in the same company (non-occupational MTBE exposure group, n=118). Statistics was performed by t-test.

**Supplementary figure 2.** The correlations between all indicators involved in this study. Blood MTBE levels were positively correlated with the triglyceride glucose (TyG) index, fasting plasma glucose (FPG), BMI, waist circumference (WC) and length of service (SL), but negatively correlated with fasting insulin (Fins). The number on the lower left represented the correlation coefficient (r). The size of circle in the upper right indicated the strength of the correlation. The blue color of the circle indicated positive correlation, while the red color indicated negative correlation. Statistics was performed by the pairwise Spearman correlation analysis among all participants.
