# Supplementary material for: MTBE exposure may increase the risk of insulin resistance in male gas station workers
Source: Royal Society of Chemistry journal article supplement (doi:10.1039/d3em00491k), 2023-12-15
Supplement: d3em00491k5.pdf [file d3em00491k5.pdf]

Supplementary Table 2. Comparison of positive rates of various outcome indicators among participants in different exposure groups

| Characteristics | Overall<br>(N=201) | Non-occupational exposure<br>(N=118) | Occupational exposure<br>(N=83) | <i>p</i> -value |
|-----------------|--------------------|--------------------------------------|---------------------------------|-----------------|
| TyG>8.77        |                    |                                      |                                 | 0.020*          |
| Yes             | 87 (43.28)         | 43 (36.44)                           | 44 (53.01)                      |                 |
| No              | 114 (56.72)        | 75 (63.56)                           | 39 (46.99)                      |                 |
| Hypertension    |                    |                                      |                                 | 0.458           |
| Yes             | 91 (45.27)         | 56 (47.46)                           | 35 (42.17)                      |                 |
| No              | 110 (54.73)        | 62 (52.54)                           | 48 (57.83)                      |                 |
| FPG>5.6         |                    |                                      |                                 | <0.001**        |
| Yes             | 70 (34.83)         | 24 (20.34)                           | 46 (55.42)                      |                 |
| No              | 131 (65.17)        | 94 (79.66)                           | 37 (44.58)                      |                 |

Note: (1) Classification variables were analyzed using chi-square test of R×C contingency table.

(2) \**p*<0.05, \*\**p*<0.01.
