# Supplementary material for: MTBE exposure may increase the risk of insulin resistance in male gas station workers
Source: Royal Society of Chemistry journal article supplement (doi:10.1039/d3em00491k), 2023-12-15
Supplement: d3em00491k7.pdf [file d3em00491k7.pdf]

Supplementary Table 4. Stratified analysis of changes in high TyG index rates caused by  
MTBE exposure

| Subgroup basis    | Subgroup        | OR (95%CI)           | <i>p</i> -value |
|-------------------|-----------------|----------------------|-----------------|
| Age               | Younger(n=101)  | 1.030 (0.918, 1.156) | 0.615           |
|                   | Elder(n=100)    | 1.133 (1.005, 1.277) | 0.042*          |
| Length of Service | Shorter(n=102)  | 1.074 (0.953, 1.212) | 0.242           |
|                   | Longer(n=99)    | 1.080 (0.973, 1.199) | 0.148           |
| BMI               | Normal(n=81)    | 1.121 (0.969, 1.298) | 0.125           |
|                   | Abnormal(n=120) | 1.084 (0.986, 1.192) | 0.095           |
| Drinking          | No(n=61)        | 1.081 (0.858, 1.363) | 0.509           |
|                   | Yes(n=140)      | 1.081 (0.990, 1.181) | 0.084           |

Note: (1) Logistic regression model adjusted for age, length of service, TC levels, BMI score, and waist circumference. (2) According to the median, age was divided into younger ( $\leq 44$ ) and elder ( $> 44$ ), and length of Services were divided into shorter ( $\leq 18$ ) and longer ( $> 18$ ). BMI values ranging from 18.5 to 23.9 were normal, and values above 23.9 were considered abnormal. (3) \* $p < 0.05$ .
