# Supplementary figures and images for: MTBE exposure may increase the risk of insulin resistance in male gas station workers
Source: Royal Society of Chemistry journal article supplement (doi:10.1039/d3em00491k), 2023-12-15

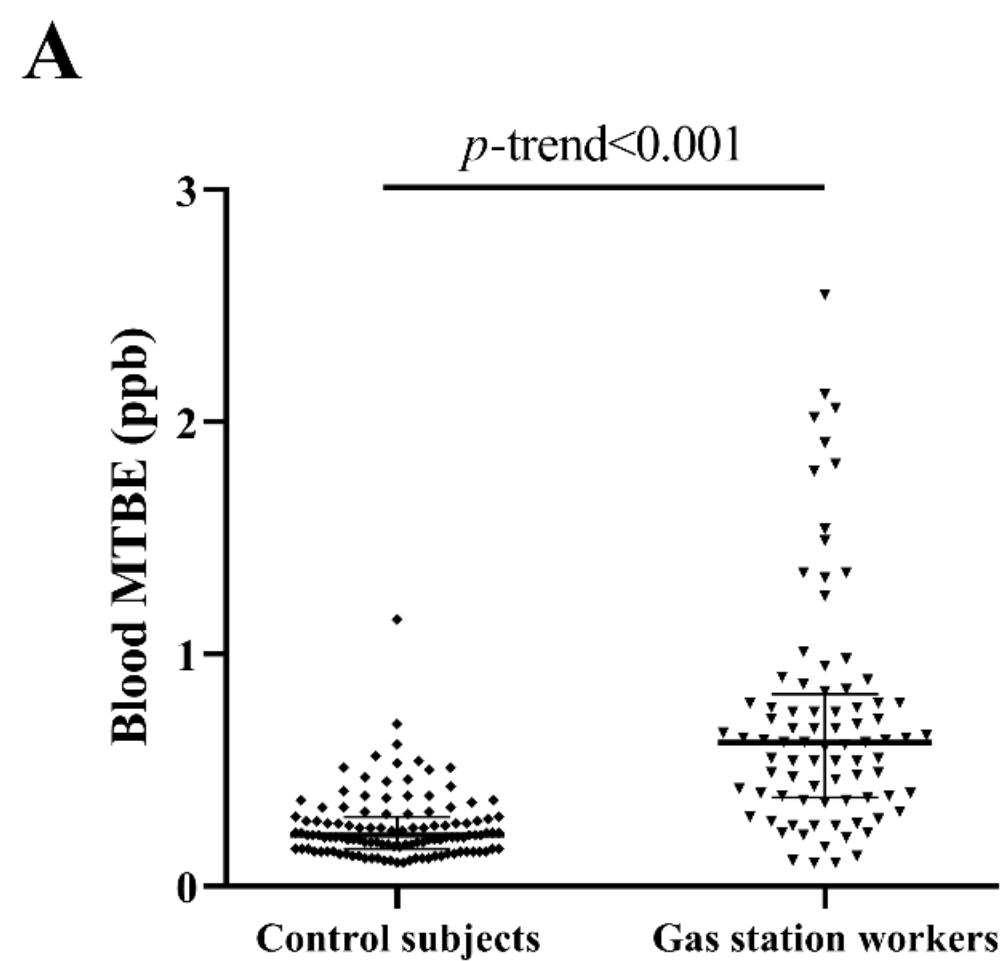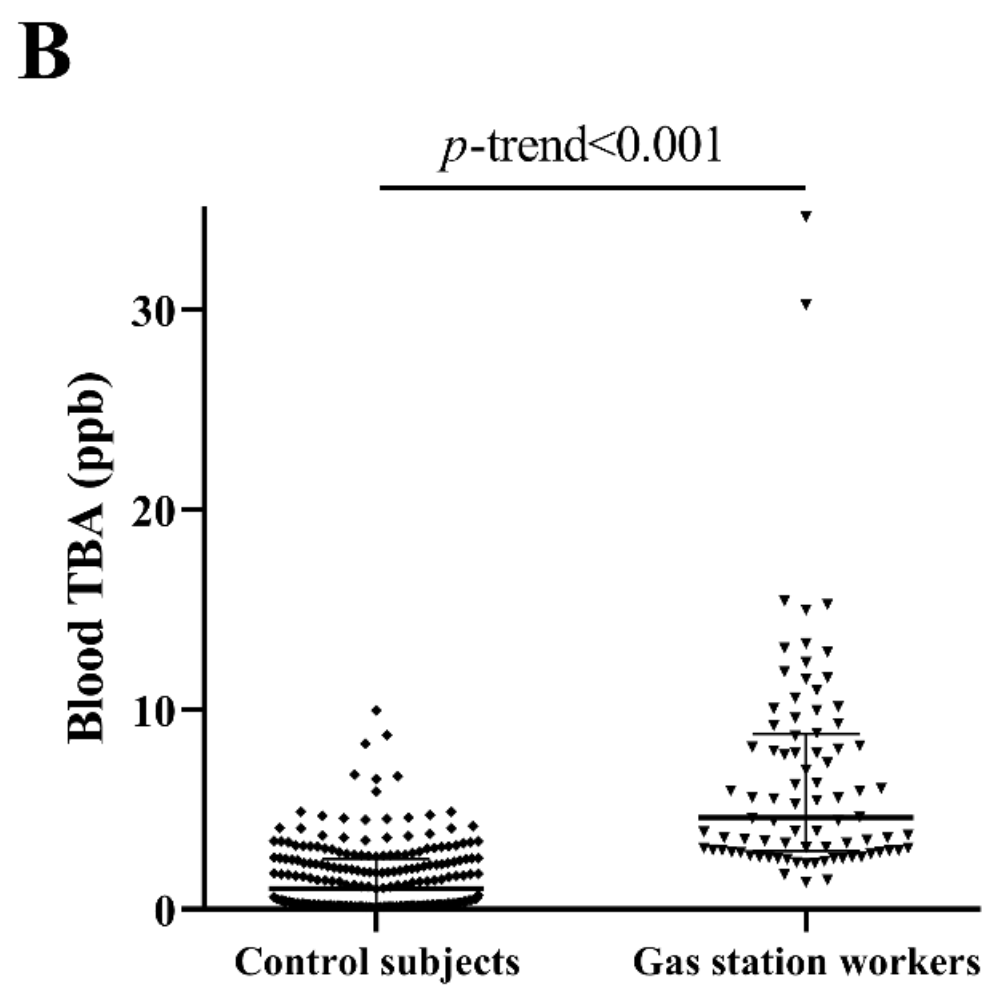

Supplement: d3em00491k2.pdf [file d3em00491k2.pdf]

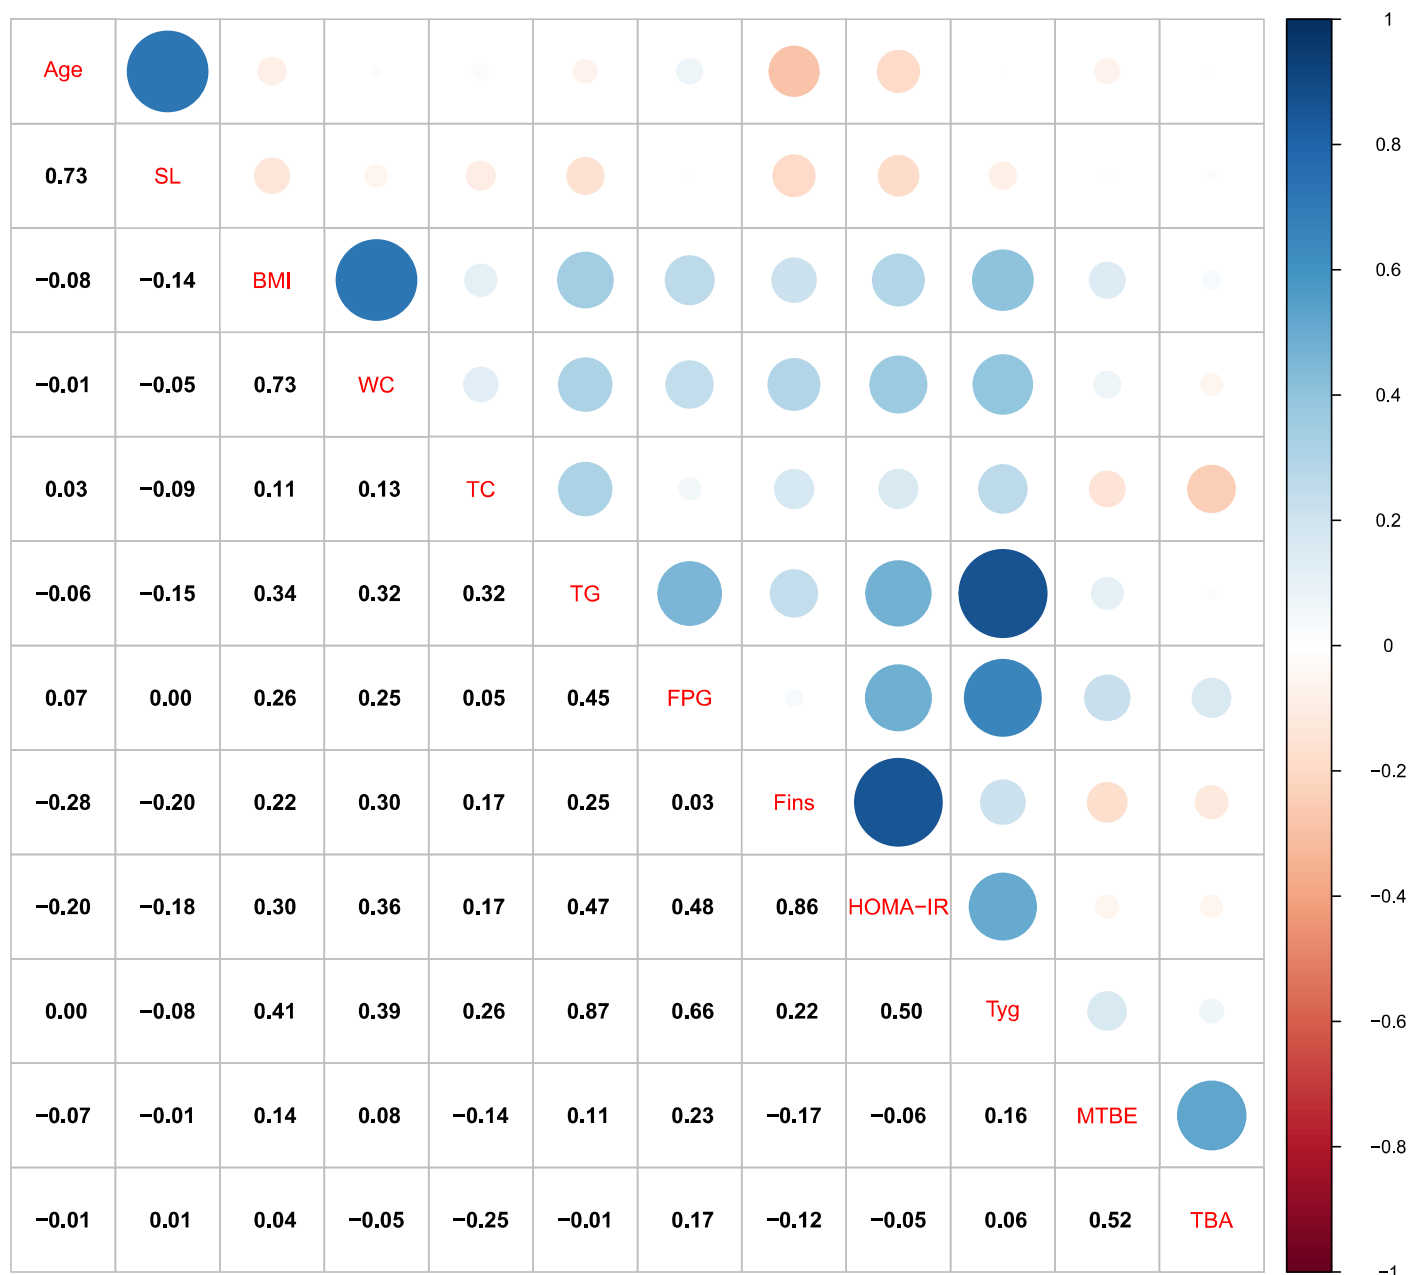

Supplement: d3em00491k3.pdf [file d3em00491k3.pdf]
